# Supplementary material
Source: bioRxiv or medRxiv preprint supplement (https://www.biorxiv.org/highwire/filestream/16792/field_highwire_adjunct_files/0/059188-1.pdf)
Supplement: Supplementary file [file 059188-1.pdf]

## Supplementary Materials

Scanning the Horizon: Future challenges for neuroimaging research.

Russell A. Poldrack<sup>1</sup>, Chris I. Baker<sup>2</sup>, Joke Durnez<sup>1</sup>, Krzysztof J. Gorgolewski<sup>1</sup>, Paul Matthews<sup>3</sup>, Marcus Munafò<sup>4,5</sup>, Thomas E. Nichols<sup>6</sup>, Jean-Baptiste Poline<sup>7</sup>, Edward Vul<sup>8</sup>, Tal Yarkoni<sup>9</sup>

### Supplementary Tables:

| Paradigm | Anatomical mask (intersected with functional mask) | mask size | Cohen's D |        |       | Percent BOLD change |        |        |
|----------|----------------------------------------------------|-----------|-----------|--------|-------|---------------------|--------|--------|
|          |                                                    |           | P10       | median | P90   | P10                 | median | P90    |
| MOTOR    | Precentral Gyrus                                   | 12894     | 0.158     | 0.628  | 1.070 | 0.505               | 2.707  | 8.582  |
|          | Supplementary motor cortex                         | 3418      | 0.211     | 0.716  | 1.197 | 0.911               | 4.033  | 12.510 |
|          | Left putamen                                       | 1532      | 0.114     | 0.513  | 0.864 | 0.586               | 2.388  | 4.318  |
|          | Right putamen                                      | 1437      | -0.008    | 0.369  | 0.749 | -0.045              | 1.696  | 3.609  |
| WM       | Middle frontal gyrus                               | 7116      | 0.101     | 0.474  | 0.837 | 0.130               | 0.986  | 2.504  |
| EMOTION  | Left amygdala                                      | 1133      | 0.265     | 0.534  | 1.065 | 0.516               | 1.198  | 3.379  |
|          | Right amygdala                                     | 1082      | 0.308     | 0.645  | 1.140 | 0.581               | 1.350  | 3.557  |
| GAMBLING | Left accumbens                                     | 455       | 0.138     | 0.310  | 0.461 | 0.369               | 0.849  | 1.440  |
|          | Right accumbens                                    | 417       | 0.141     | 0.332  | 0.488 | 0.373               | 0.981  | 1.618  |

**Table S1:** Effect size estimates and their 10th and 90th percentile for common experimental paradigms. Linear mixed effects group analyses were performed using FSL<sup>1</sup> on 186 independent subjects from the Human Connectome Project<sup>2</sup> on four tasks (contrast): motor (average), working memory (2-back versus 0-back), emotion (fear-neutral) and gambling (reward-punish). The effect sizes given are the median effect sizes within the intersection of functional and anatomical masks, where the former is the result of a forward inference meta-analysis using neurosynth.org<sup>3</sup> with the search words equal to the paradigm, and the latter are masks derived from the Harvard-Oxford probabilistic atlas<sup>4</sup> with probabilities thresholded at 0. Data and code to generate this table are available at <https://github.com/poldracklab/power>.

### Supplementary methods:

Figure 1: In a statistical map within an MNI template with smoothness of three times the voxel size, we assume one active region with voxelwise standardised effect size  $D$ . The spatial extent of the region is relatively small: we expect only one local maximum in the region. The voxelwise statistical significance threshold is computed with random field theory<sup>5</sup> using FSL's ptot function<sup>1</sup>. The probability that the local maximum exceeds this significance threshold is computed using the distribution of local maxima from Cheng and Schwartzman<sup>6</sup>.

Figure 2: Simulated fMRI and behavioral data were generated from a Gaussian distribution for 24 simulated subjects, and the fMRI data were smoothed with a 6 mm Gaussian kernel. A univariate analysis was performed to assess correlation between activation and the simulated behavioral regressor, and the resulting statistical map was thresholded at  $p < 0.005$  and a 50 voxel extent threshold (i.e. a heuristic correction for multiple comparisons).

1. Jenkinson, M., Beckmann, C. F., Behrens, T. E. J., Woolrich, M. W. & Smith, S. M. FSL. *Neuroimage* **62**, 782–790 (2012).
2. Van Essen, D. C. *et al.* The WU-Minn Human Connectome Project: An overview. *Neuroimage* **80**, 62–79 (2013).
3. Yarkoni, T., Poldrack, R. A., Nichols, T. E., Van Essen, D. C. & Wager, T. D. Large-scale automated synthesis of human functional neuroimaging data. *Nat. Methods* **8**, 665–670 (2011).
4. Desikan, R. S. *et al.* An automated labeling system for subdividing the human cerebral cortex on MRI scans into gyral based regions of interest. *Neuroimage* **31**, 968–980 (2006).
5. Friston, K. J., Frith, C. D., Liddle, P. F. & Frackowiak, R. S. Comparing functional (PET) images: the assessment of significant change. *J. Cereb. Blood Flow Metab.* **11**, 690–699 (1991).
6. Cheng, D. & Schwartzman, A. On the Explicit Height Distribution and Expected Number of Local Maxima of Isotropic Gaussian Random Fields. *arXiv [math.PR]* (2015).
